# Supplementary material for: Inhibition of bromodomain and extra-terminal proteins targets constitutively active NFκB and STAT signaling in lymphoma and influences the expression of the antiapoptotic proteins BCL2A1 and c-MYC
Source: PubMed Central journal article supplement (PMC11348570; doi:10.1186/s12964-024-01782-9), 2024-08-27
Supplement: 12964_2024_1782_MOESM2_ESM.pdf [file 12964_2024_1782_MOESM2_ESM.pdf]

# Supplementary Figures

## Supplementary Figure 1

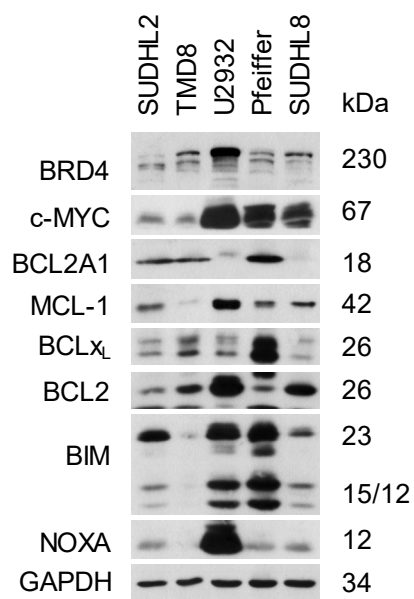

### Supplementary Fig. 1: Basal expression of key regulators in DLBCL cell lines (related to Fig. 2)

Western Blot of endogenous protein expression in SUDHL2, TMD8, U2932 (all ABC subtype), Pfeiffer and SUDHL6 (all GCB subtype) cells [One representative blot out of two independent experiments is shown].

## Supplementary Figure 2

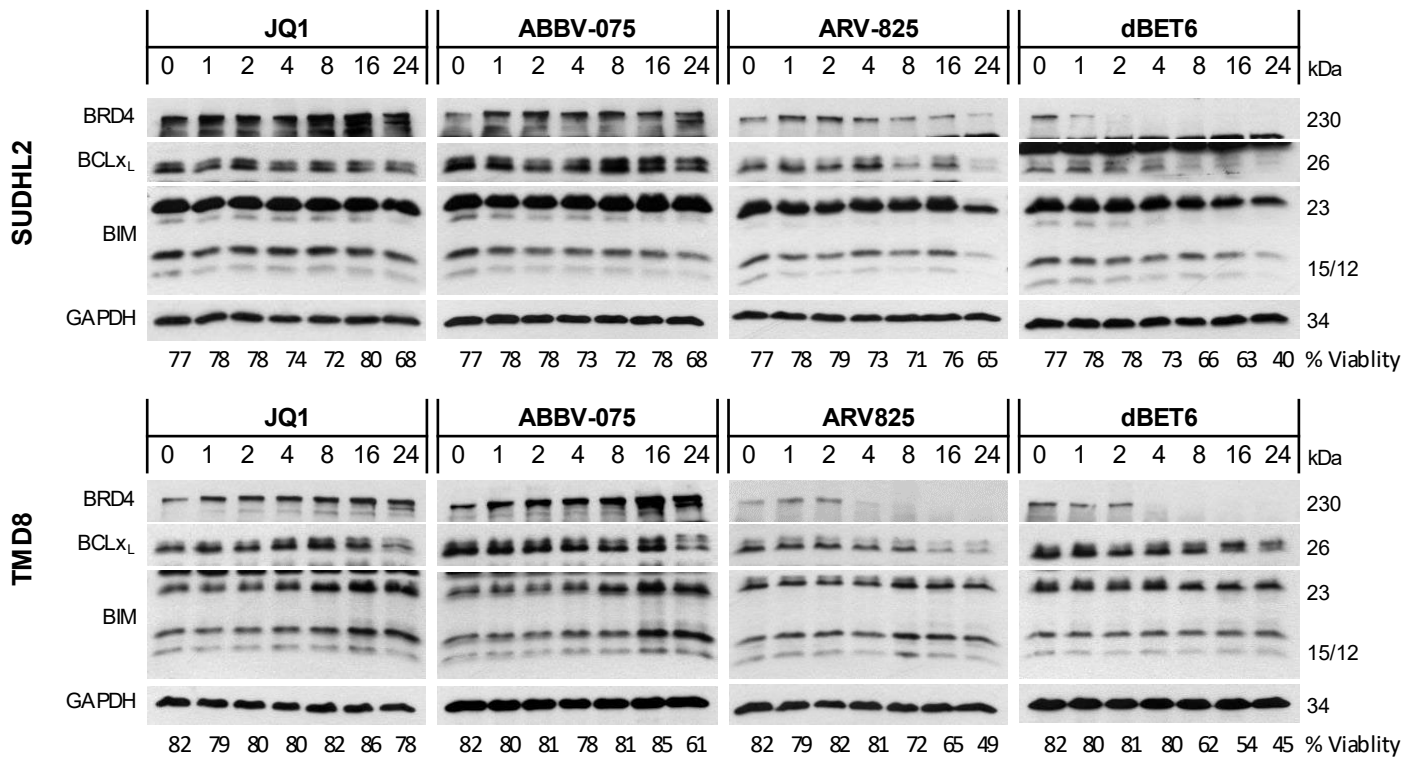

**Supplement Fig. 2: Regulation of BRD4 and BCL2 family proteins (related to Fig. 3a)**

Western Blot in SUDHL2 and TMD8 cells upon treatment with JQ1 [1 $\mu$ M], ABBV-075 [SUDHL2 100nM/TMD8 300nM], ARV-825 [SUDHL2 100nM/TMD8 30nM] or dBET6 [SUDHL2 100nM/TMD8 30nM] up to 24h. [One representative blot out of three independent experiments is shown.]

### Supplementary Figure 3

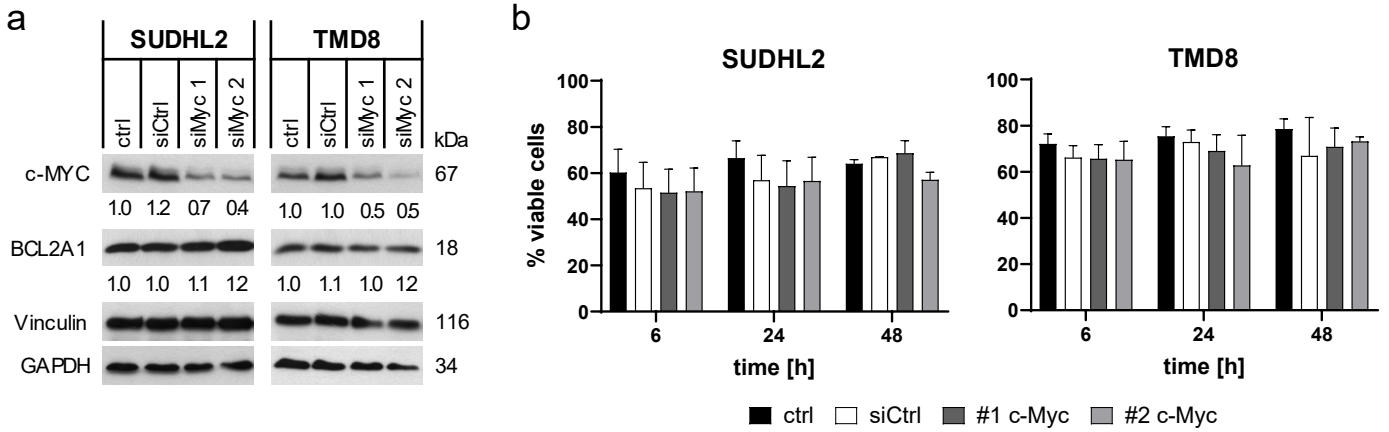

**Supplementary Fig. 3: Effects of cMYC knockdown on BCL2A1 protein expression and viability (related to Fig. 5)**

a) Western Blot of c-MYC and BCL2A1 expression upon knockdown of c-Myc by two individual siRNA oligonucleotides [One representative blot out of three independent experiments is shown]. Numbers below the blots indicate quantification of normalized protein expression related to the loading controls Vinculin and GAPDH. b) Cell death analysis upon knockdown of c-Myc analysed by staining with AnnexinV-FITC and flow cytometry at 6, 24, and 48 h after knockdown [data shown are mean + SD of three independent experiments].

## Supplementary Figure 4

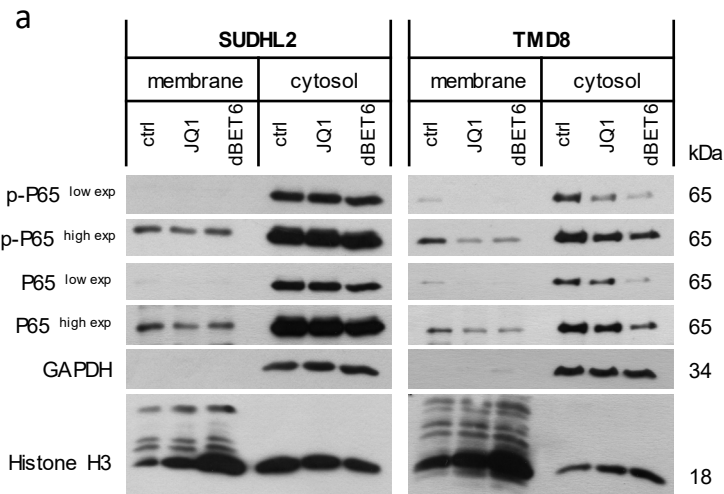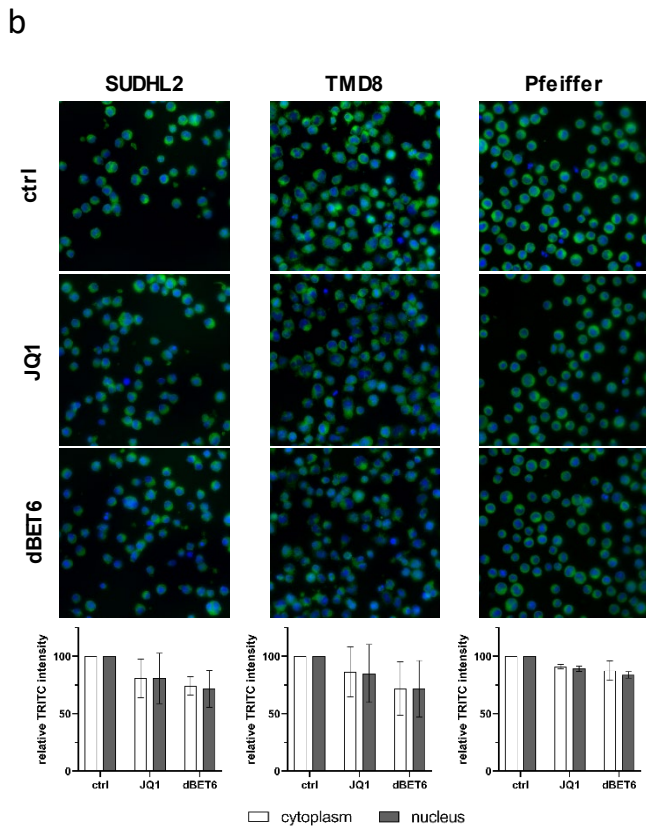

### Supplementary Fig. 4: Effects of BETi treatment on p65 translocation (related to Fig. 5)

a) Western blot of fractionated lysates in SUDHL2 and TMD8 cells treated with JQ1 [1 $\mu$ M] or dBET6 [SUDHL2 100nM/TMD8 30nM] for 8h [One representative blot out of three independent experiments is shown]. b) Immunofluorescence staining of p65 in SUDHL2, TMD8 and Pfeiffer cells treated with JQ1 [1 $\mu$ M] or dBET6 [SUDHL2 100nm/TMD8 30nM] for 2h, Analysis was performed with CellProfiler. [Data are shown as mean + standard deviation (SD) with n=3].
